# Supplementary material
Source: PubMed Central journal article supplement (PMC6141009)
Supplement: NIHMS77774-supplement-Supplementary_Figure_1.pdf [file NIHMS77774-supplement-Supplementary_Figure_1.pdf]

**Figure 1g**

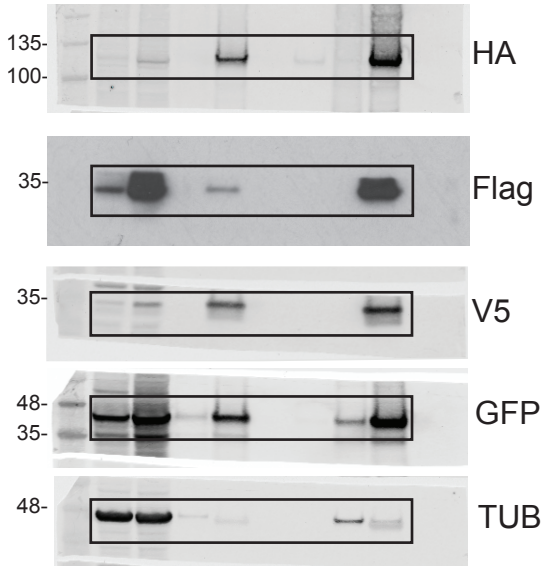

**Figure 3g**

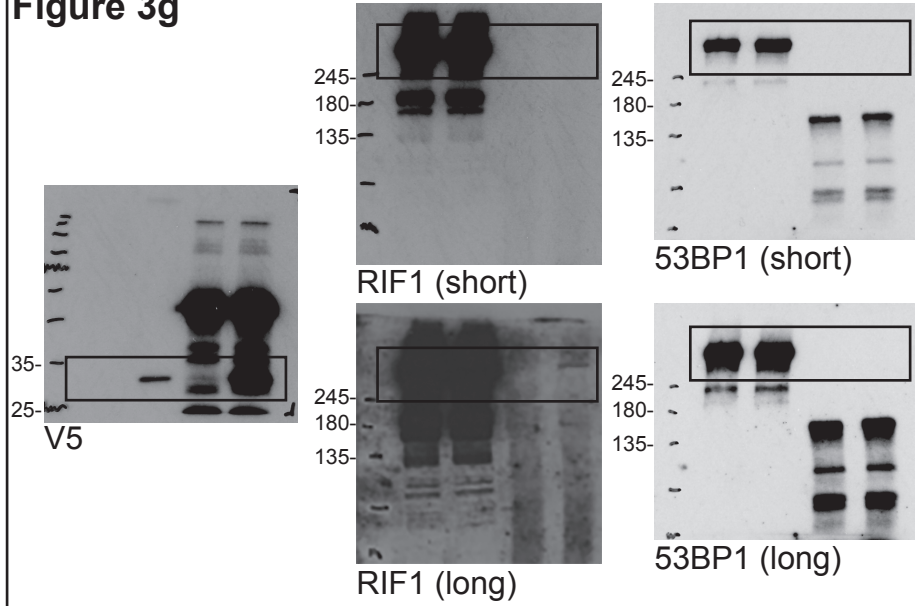

**Figure 3i + ED Figure 8g**

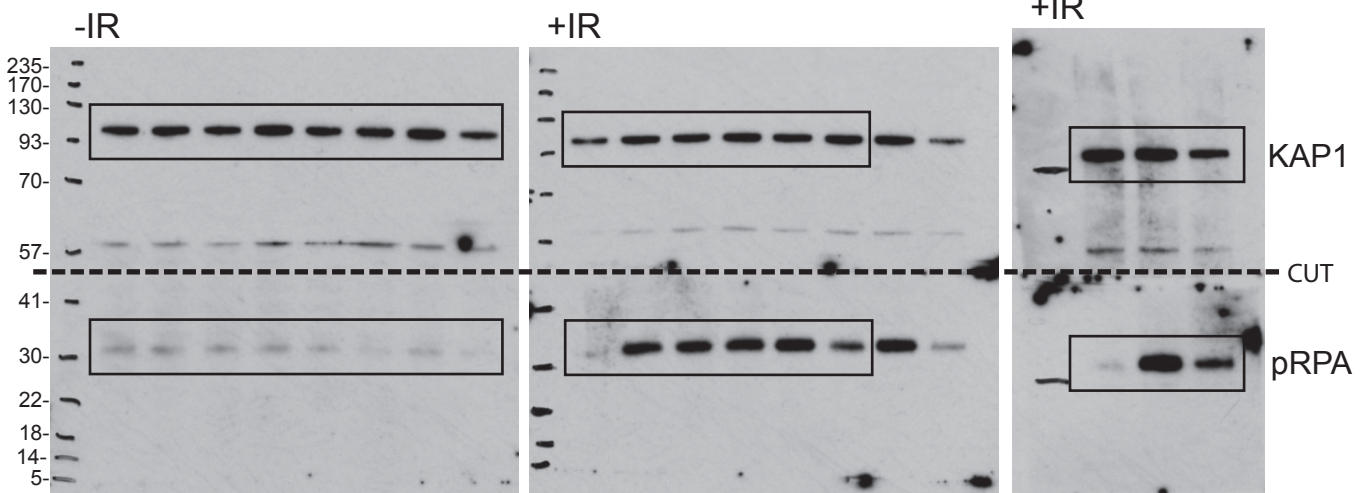

**ED Figure 4d**

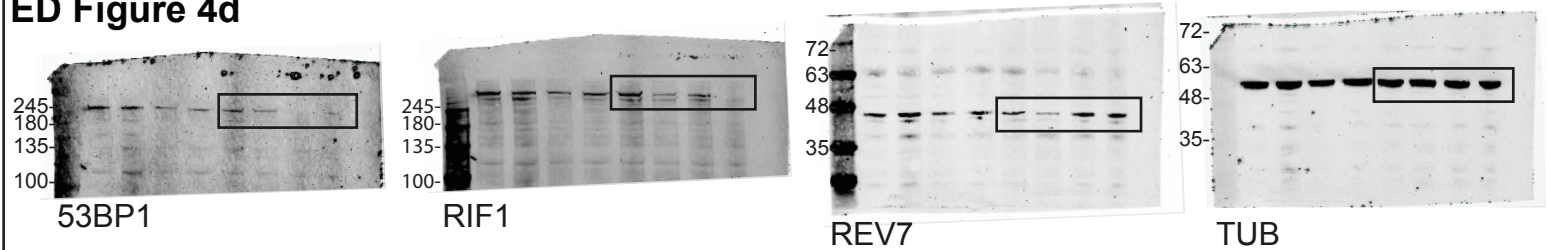

**ED Figure 7a**

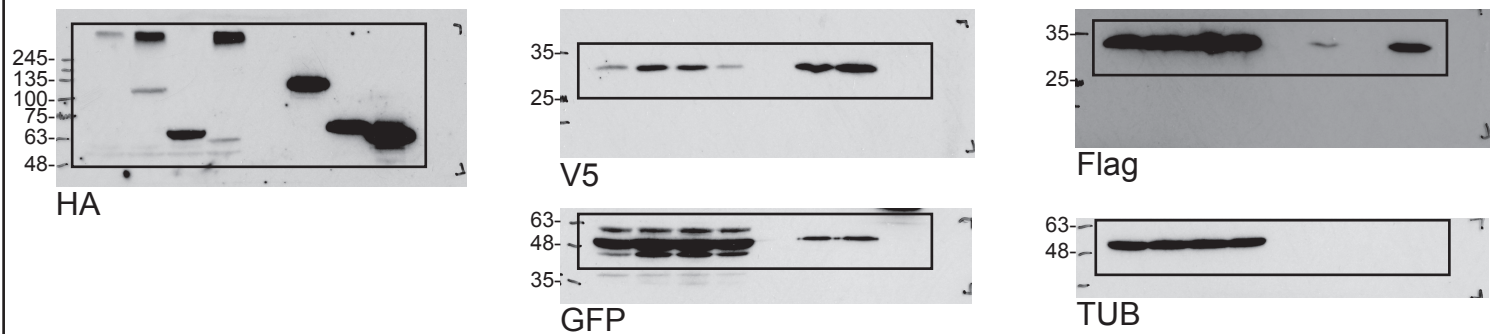

**ED Figure 7b**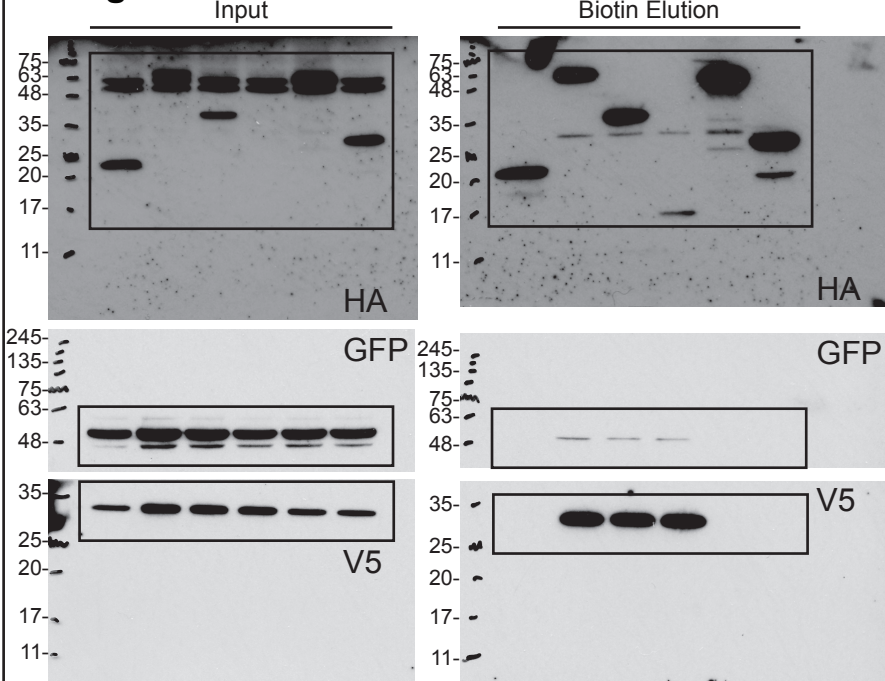**ED Figure 7c**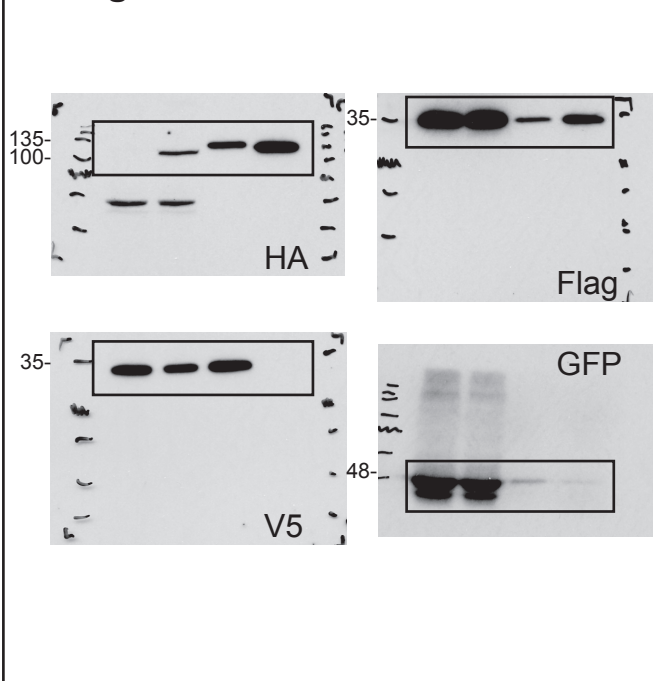**ED Figure 7d**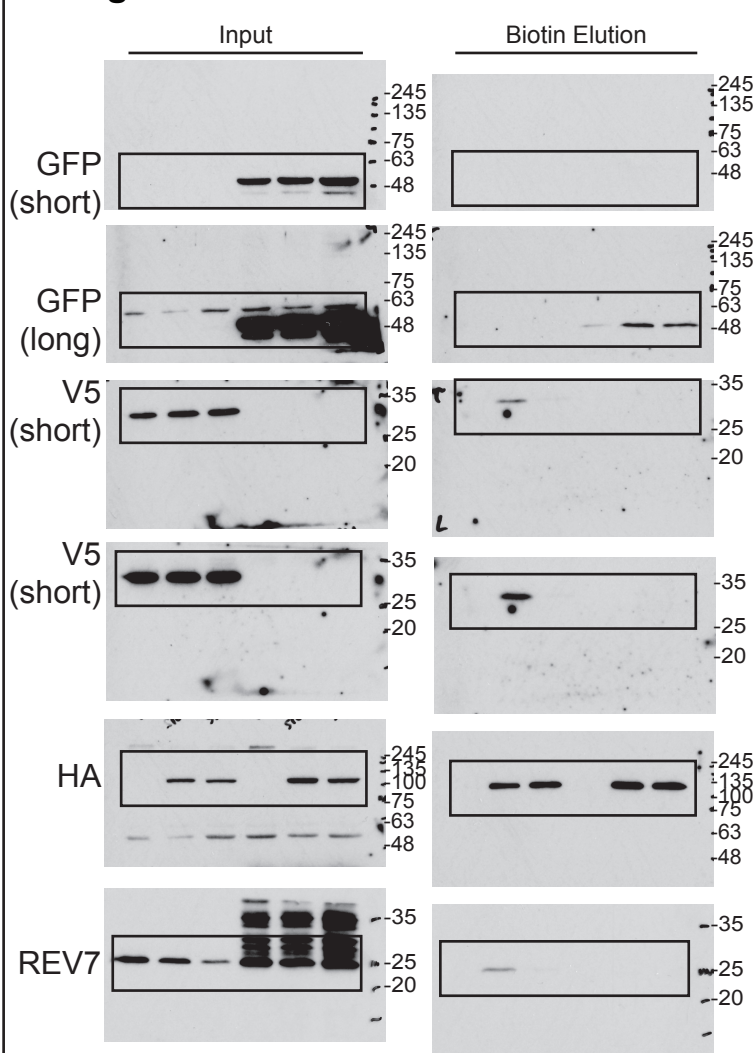**ED Figure 7e**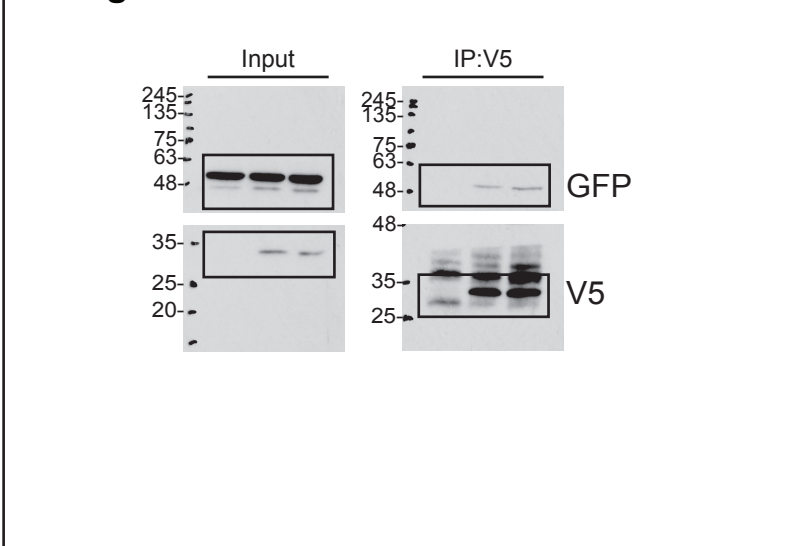**ED Figure 7f**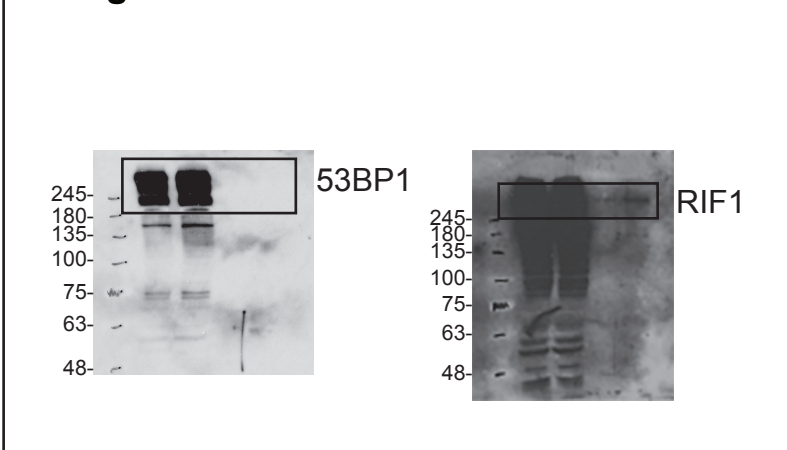**ED Figure 10e**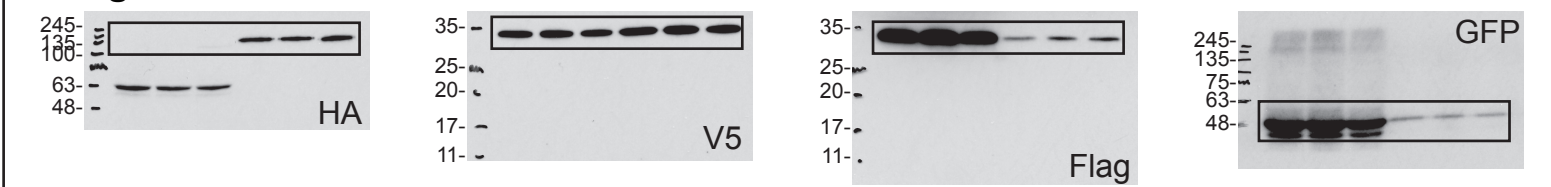

NOTE: Figures 4cd and ED Figures 9bc are shown uncropped in the original manuscript.
